# Supplementary material for: Intraspecific Variation on Palm Leaf Traits of Co-occurring Species—Does Local Hydrology Play a Role?
Source: Frontiers journal article supplement (doi:10.3389/ffgc.2021.715266), 2021-09-01
Supplement: Data_Sheet_1.xlsx [file Data_Sheet_1.xlsx]

## Sheet: metadata
Supplementary material to Emilio T, Pereira H Jr and Costa FRC (2021) Intraspecific Variation on Palm Leaf Traits of Co-occurring Species—Does Local Hydrology Play a Role? Front. For. Glob. Change 4:715266. doi: 10.3389/ffgc.2021.715266
Column	Description	Unit
species	Species name	N/A
speciesAuthor	Species name (including author) following the Wold Checklist of Selected Plant Names consulted in 13/07/2021	N/A
Individual	Sequential number identifing individuals within each species	N/A
plot	Plot identifier for Reserva Florestal Adolpho Ducke	N/A
HAND	Height Above Nearest Drainage extracted from each plot by Schietti et al 2013 (please check references)	m
SD	Stomatal density	cm-²
SL	Stomatal length	µm cm-²
VD	Vein density	mm² cm-²
LDMC	Leaf dry matter content	mg g-¹
LT	Leaf thickness	mm
SLA	Specific leaf area	cm² g-¹
LA	Leaf area	m²

## Sheet: data
Supplementary material to Emilio T, Pereira H Jr and Costa FRC (2021) Intraspecific Variation on Palm Leaf Traits of Co-occurring Species—Does Local Hydrology Play a Role? Front. For. Glob. Change 4:715266. doi: 10.3389/ffgc.2021.715266
species	speciesAuthor	individual	plot	HAND	SD	SL	VD	LDMC	LT	SLA	LA
Astrocaryum tucuma	Astrocaryum tucuma Mart.	1	LO3_T1500	12.6	14.67	38.94	18	738.687	0.14	253.238	2.07641
Astrocaryum tucuma	Astrocaryum tucuma Mart.	2	LO3_T1500	12.6	12.33	42.35	18.6	328.509	0.15	423.029	2.65431
Astrocaryum tucuma	Astrocaryum tucuma Mart.	3	LO3_T1500	12.6	9.33	47.05	14.22	344.372	0.12	292.117	1.08644
Astrocaryum tucuma	Astrocaryum tucuma Mart.	4	LO3_T2500	1.44	10	43.07	15.59	404.584	0.11	262.268	1.60225
Astrocaryum tucuma	Astrocaryum tucuma Mart.	5	LO3_T2500	1.44	12.67	48.04	22.42	329.59	0.09	334.541	1.27903
Astrocaryum tucuma	Astrocaryum tucuma Mart.	6	LO4_T1500	4.35	12.67	46.46	18.2	407.463	0.09	374.316	2.04376
Astrocaryum tucuma	Astrocaryum tucuma Mart.	7	LO4_T1500	4.35	13.67	40.41	11.92	296.183	0.13	496.585	1.58846
Astrocaryum tucuma	Astrocaryum tucuma Mart.	8	LO4_T1500	4.35	9.67	47.51	13.38	501.201	0.12	376.941	2.26708
Astrocaryum tucuma	Astrocaryum tucuma Mart.	9	LO4_T1500	4.35	15.33	44.33	14	484.063	0.13	201.387	1.2673
Astrocaryum tucuma	Astrocaryum tucuma Mart.	10	LO2_T1000	37.45	13.67	45.59	9.98	441.472	0.12	218.631	3.29132
Astrocaryum sciophilum	Astrocaryum sciophilum (Miq.) Pulle	1	LO3_T1500	12.6	19.33	58.38	17.83	303.871	0.22	434.794	4.59782
Astrocaryum sciophilum	Astrocaryum sciophilum (Miq.) Pulle	2	LO3_T1500	12.6	15.33	53.26	18.99	248.304	0.18	426.003	5.86012
Astrocaryum sciophilum	Astrocaryum sciophilum (Miq.) Pulle	3	LO3_T1500	12.6	21.67	50.02	15.83	354.683	0.21	255.555	4.26919
Astrocaryum sciophilum	Astrocaryum sciophilum (Miq.) Pulle	4	LO3_T2500	1.44	13.67	66.98	24.67	515.375	0.23	190.061	3.76138
Astrocaryum sciophilum	Astrocaryum sciophilum (Miq.) Pulle	5	LO3_T2500	1.44	13.67	68.97	26.08	387.185	0.19	305.39	3.05065
Astrocaryum sciophilum	Astrocaryum sciophilum (Miq.) Pulle	6	LO3_T2500	1.44	17	62.32	23.84	477.106	0.24	127.165	3.47039
Astrocaryum sciophilum	Astrocaryum sciophilum (Miq.) Pulle	7	LO4_T1500	4.35	21.33	44.27	21.07	633.786	0.2	171.676	5.61437
Astrocaryum sciophilum	Astrocaryum sciophilum (Miq.) Pulle	8	LO1_T0000	8.37	15	62.25	13.53	467.662	0.21	218.729	4.61333
Astrocaryum sciophilum	Astrocaryum sciophilum (Miq.) Pulle	9	LO1_T0000	8.37	17	65.8	13.31	425.728	0.22	174.34	2.90206
Astrocaryum sciophilum	Astrocaryum sciophilum (Miq.) Pulle	10	LO1_T2000	37.45	15.67	65.61	19.86	323.16	0.22	279.756	3.71568
Attalea attaleoides	Attalea attaleoides (Barb.Rodr.) Wess.Boer	1	LO3_T2500	1.44	21	44.92	15.31	407.401	0.16	379.019	5.92944
Attalea attaleoides	Attalea attaleoides (Barb.Rodr.) Wess.Boer	2	LO4_T1500	4.35	13.67	43.44	12.33	445.825	0.15	248.248	5.73298
Attalea attaleoides	Attalea attaleoides (Barb.Rodr.) Wess.Boer	3	LO4_T1500	4.35	17.67	32.23	15.69	436.048	0.15	187.329	4.95008
Attalea attaleoides	Attalea attaleoides (Barb.Rodr.) Wess.Boer	4	LO4_T1500	4.35	16.33	37.71	14.34	570.676	0.13	474.488	5.71344
Attalea attaleoides	Attalea attaleoides (Barb.Rodr.) Wess.Boer	5	LO1_T1000	37.89	11.33	41.33	19.45	518.928	0.15	187.342	5.55109
Attalea attaleoides	Attalea attaleoides (Barb.Rodr.) Wess.Boer	6	LO2_T2000	19.31	12	34.55	14.11	383.75	0.17	357.599	4.54227
Attalea attaleoides	Attalea attaleoides (Barb.Rodr.) Wess.Boer	7	LO1_T2000	37.45	13.67	25.89	11.46	423.995	0.16	322.92	4.79208
Attalea attaleoides	Attalea attaleoides (Barb.Rodr.) Wess.Boer	8	LO1_T2000	37.45	13.33	47.74	14.87	479.709	0.17	167.887	5.72618
Attalea attaleoides	Attalea attaleoides (Barb.Rodr.) Wess.Boer	9	LO2_T2000	19.31	19	49.82	12.44	487.478	0.2	192.983	5.18352
Attalea attaleoides	Attalea attaleoides (Barb.Rodr.) Wess.Boer	10	LO2_T2000	19.31	16.33	46.41	17.14	488.184	0.15	236.694	5.44242
Attalea microcarpa	Attalea microcarpa Mart.	1	LO4_T500	4.65	9	46.42	12.82	389.149	0.18	482.889	11.6696
Attalea microcarpa	Attalea microcarpa Mart.	2	LO4_T500	4.65	10.67	49.07	19.41	420.954	0.14	311.684	6.61271
Attalea microcarpa	Attalea microcarpa Mart.	3	LO4_T500	4.65	9.67	53.71	14.87	499.765	0.13	314.818	11.7687
Attalea microcarpa	Attalea microcarpa Mart.	4	LO4_T1500	4.35	14	50.51	15.84	498.046	0.21	185.354	14.1057
Attalea microcarpa	Attalea microcarpa Mart.	5	LO4_T1500	4.35	10.67	53.96	17.56	485.19	0.23	175.438	11.1168
Attalea microcarpa	Attalea microcarpa Mart.	6	LO3_T3500	3.02	13.67	50.13	14.48	466.873	0.17	126.722	5.21226
Attalea microcarpa	Attalea microcarpa Mart.	7	LO3_T3500	3.02	13.67	51.94	12.16	442.975	0.18	173.226	5.30238
Attalea microcarpa	Attalea microcarpa Mart.	8	LO3_T3500	3.02	11.67	50.96	12.9	403.931	0.2	171.763	8.47136
Attalea microcarpa	Attalea microcarpa Mart.	9	LO3_T3500	3.02	11.67	55.75	12.35	553.851	0.18	116.161	5.86101
Attalea microcarpa	Attalea microcarpa Mart.	10	LO2_T1000	37.45	11.67	51.32	14.97	383.712	0.2	272.712	7.6494
Bactris elegans	Bactris elegans Barb.Rodr. & Trail	1	LO3_T2500	1.44	6	64.95	10.21	429.464	0.12	373.634	0.449295
Bactris elegans	Bactris elegans Barb.Rodr. & Trail	2	LO3_T2500	1.44	5.33	64.76	11.9	411.871	0.12	390.659	0.611424
Bactris elegans	Bactris elegans Barb.Rodr. & Trail	3	LO3_T2500	1.44	6.67	57.57	9.75	438.885	0.11	377.853	0.464336
Bactris elegans	Bactris elegans Barb.Rodr. & Trail	4	LO3_T4500	32.97	7.33	62.3	6.87	458.689	0.14	357.161	0.655305
Bactris elegans	Bactris elegans Barb.Rodr. & Trail	5	LO3_T4500	32.97	5.33	63.3	9.15	496.855	0.14	369.89	0.569723
Bactris elegans	Bactris elegans Barb.Rodr. & Trail	6	LO3_T4500	32.97	5.33	61.25	7.76	429.929	0.15	417.862	0.736568
Bactris elegans	Bactris elegans Barb.Rodr. & Trail	7	LO3_T4500	32.97	5.33	64.33	11.41	467.456	0.17	425.989	0.418175
Bactris elegans	Bactris elegans Barb.Rodr. & Trail	8	LO2_T1000	37.45	7	55.98	16.92	510.818	0.12	374.16	0.592497
Bactris elegans	Bactris elegans Barb.Rodr. & Trail	9	LO1_T2000	37.45	5.67	59.84	17.69	474.869	0.15	310.014	0.603586
Bactris elegans	Bactris elegans Barb.Rodr. & Trail	10	LO1_T2000	37.45	6.33	56.4	18.1	474.873	0.14	318.456	0.620026
Bactris hirta	Bactris hirta Mart.	1	LO3_T500	31.96	8.67	53.19	10.41	400.676	0.34	43.0521	0.00430521
Bactris hirta	Bactris hirta Mart.	2	LO3_T500	31.96	8.33	53.97	10.44	495.792	0.55	33.0283	0.00330283
Bactris hirta	Bactris hirta Mart.	3	LO3_T500	31.96	7.33	60.38	9.17	470.444	0.25	31.4376	0.00314376
Bactris hirta	Bactris hirta Mart.	4	LO3_T2500	1.44	7	55.76	7.66	396.399	0.09	35.6315	0.00356315
Bactris hirta	Bactris hirta Mart.	5	LO3_T2500	1.44	8.67	54.86	10.69	481.499	0.21	62.4382	0.00624382
Bactris hirta	Bactris hirta Mart.	6	LO4_T500	4.65	7.67	58	10.64	476.011	0.19	59.4504	0.00594504
Bactris hirta	Bactris hirta Mart.	7	LO4_T500	4.65	5	54.92	8	362.596	0.2	109.033	0.0109033
Bactris hirta	Bactris hirta Mart.	8	LO4_T500	4.65	6.33	56.2	7.81	472.148	0.14	66.6641	0.00666641
Bactris hirta	Bactris hirta Mart.	9	LO4_T500	4.65	9	63.35	9.08	499.099	0.14	72.9859	0.00729859
Bactris hirta	Bactris hirta Mart.	10	LO4_T500	4.65	8.33	59.43	9.01	501.813	0.32	26.6166	0.00266166
Euterpe precatoria	Euterpe precatoria Mart.	1	LO1_T4000	27.56	11.33	23.51	17.96	469.898	0.09	237.575	4.58823
Euterpe precatoria	Euterpe precatoria Mart.	2	LO1_T4000	27.56	6.33	43.77	13.88	452.441	0.08	508.312	5.08259
Euterpe precatoria	Euterpe precatoria Mart.	3	LO1_T4000	27.56	13.33	26.55	15.03	478.333	0.06	474.646	5.69867
Euterpe precatoria	Euterpe precatoria Mart.	4	LO1_T4000	27.56	10.67	28.86	10.2	446.446	0.07	387.585	3.13195
Euterpe precatoria	Euterpe precatoria Mart.	5	LO2_T0000	11.93	11.33	27.82	19.63	486.831	0.1	381.187	6.88479
Euterpe precatoria	Euterpe precatoria Mart.	6	LO2_T0000	11.93	12.33	27.96	17.44	466.35	0.08	340.98	3.35524
Euterpe precatoria	Euterpe precatoria Mart.	7	LO2_T0000	11.93	5.33	33.66	24.8	496.591	0.09	219.904	2.41337
Euterpe precatoria	Euterpe precatoria Mart.	8	LO4_T500	4.65	12	42.37	33.38	445.827	0.09	567.43	2.98511
Euterpe precatoria	Euterpe precatoria Mart.	9	LO4_T500	4.65	12	49.34	38.23	444.444	0.1	516.65	5.09761
Euterpe precatoria	Euterpe precatoria Mart.	10	LO4_T500	4.65	7.67	61.89	23.88	530.618	0.1	423.782	5.12695
Geonoma aspidiifolia	Geonoma aspidiifolia Spruce	1	LO3_T1500	12.6	4.67	62.02	6.21	376.638	0.35	146.663	0.0240234
Geonoma aspidiifolia	Geonoma aspidiifolia Spruce	2	LO3_T1500	12.6	5	66.05	6.11	283.984	0.42	176.437	0.0297825
Geonoma aspidiifolia	Geonoma aspidiifolia Spruce	3	LO3_T1500	12.6	5.33	66.89	5.65	366.315	0.44	66.5519	0.0148078
Geonoma aspidiifolia	Geonoma aspidiifolia Spruce	4	LO3_T2500	1.44	4.33	63.28	4.72	356.961	0.14	161.712	0.0250007
Geonoma aspidiifolia	Geonoma aspidiifolia Spruce	5	LO3_T2500	1.44	4.67	66.11	5.71	321.55	0.11	182.458	0.0189209
Geonoma aspidiifolia	Geonoma aspidiifolia Spruce	6	LO3_T2500	1.44	5.67	64.11	5.61	440.407	0.12	94.1304	0.0220171
Geonoma aspidiifolia	Geonoma aspidiifolia Spruce	7	LO4_T1500	4.35	5.33	54.74	5.41	247.994	0.37	79.9851	0.0155731
Geonoma aspidiifolia	Geonoma aspidiifolia Spruce	8	LO4_T1500	4.35	5.67	55.78	4.92	241.879	0.38	121.221	0.021844
Geonoma aspidiifolia	Geonoma aspidiifolia Spruce	9	LO4_T1500	4.35	5.67	54.5	4.22	394.443	0.35	79.0674	0.0131331
Geonoma aspidiifolia	Geonoma aspidiifolia Spruce	10	LO4_T1500	4.35	6	59.98	5.23	500.998	0.28	68.385	0.0188811
Iriartella setigera	Iriartella setigera (Mart.) H.Wendl.	1	LO3_T1500	12.6	7.67	63.78	12.42	285.305	0.17	579.237	1.00808
Iriartella setigera	Iriartella setigera (Mart.) H.Wendl.	2	LO3_T1500	12.6	7.33	68.75	15.12	295.094	0.13	459.118	0.569029
Iriartella setigera	Iriartella setigera (Mart.) H.Wendl.	3	LO3_T1500	12.6	11.33	70.54	13.07	340.089	0.21	418.91	0.883295
Iriartella setigera	Iriartella setigera (Mart.) H.Wendl.	4	LO3_T2500	1.44	9.67	75.61	15.34	265.399	0.18	523.45	0.472338
Iriartella setigera	Iriartella setigera (Mart.) H.Wendl.	5	LO3_T2500	1.44	9.67	70.93	14.32	317.208	0.15	391.1	1.21579
Iriartella setigera	Iriartella setigera (Mart.) H.Wendl.	6	LO3_T2500	1.44	9	73.29	13.66	302.301	0.19	269.984	0.669255
Iriartella setigera	Iriartella setigera (Mart.) H.Wendl.	7	LO4_T500	4.65	7.67	76.04	12.39	293.892	0.15	332.764	0.547662
Iriartella setigera	Iriartella setigera (Mart.) H.Wendl.	8	LO4_T500	4.65	6.67	71.26	17.97	247.845	0.16	420.888	0.500713
Iriartella setigera	Iriartella setigera (Mart.) H.Wendl.	9	LO4_T500	4.65	5.33	62.65	14.86	353.204	0.15	322.839	0.547334
Iriartella setigera	Iriartella setigera (Mart.) H.Wendl.	10	LO4_T1500	4.35	4.67	63.91	12.84	401.958	0.19	239.035	1.06651
Oenocarpus bacaba	Oenocarpus bacaba Mart.	1	LO3_T1500	12.6	24.67	59.26	21.89	444.241	0.13	252.899	9.45971
Oenocarpus bacaba	Oenocarpus bacaba Mart.	2	LO3_T1500	12.6	17.33	52.63	16.89	447.049	0.13	155.084	3.30013
Oenocarpus bacaba	Oenocarpus bacaba Mart.	3	LO3_T1500	12.6	16.33	54.54	11.76	410.295	0.11	381.966	3.30676
Oenocarpus bacaba	Oenocarpus bacaba Mart.	4	LO3_T2500	1.44	24	56.85	11.45	358.109	0.11	465.643	7.02023
Oenocarpus bacaba	Oenocarpus bacaba Mart.	5	LO3_T2500	1.44	19.67	58.78	11.49	388.937	0.12	374.285	6.20142
Oenocarpus bacaba	Oenocarpus bacaba Mart.	6	LO3_T500	31.96	17.67	46.5	10.04	484.207	0.12	401.317	7.40362
Oenocarpus bacaba	Oenocarpus bacaba Mart.	7	LO3_T500	31.96	19.67	52.15	9.48	500.405	0.11	248.505	5.48398
Oenocarpus bacaba	Oenocarpus bacaba Mart.	8	LO4_T500	4.65	22	45.43	26.64	399.283	0.12	220.995	2.83249
Oenocarpus bacaba	Oenocarpus bacaba Mart.	9	LO4_T500	4.65	21.33	52.22	12.41	543.804	0.09	217.674	2.2609
Oenocarpus bacaba	Oenocarpus bacaba Mart.	10	LO4_T1500	4.35	19.67	64.03	17.86	447.049	0.13	176.714	6.95988
Oenocarpus bataua	Oenocarpus bataua Mart.	1	LO1_T4000	27.56	22	39.74	15.13	489.758	0.1	223.782	5.6005
Oenocarpus bataua	Oenocarpus bataua Mart.	2	LO1_T4000	27.56	14.67	48.64	27.56	483.175	0.11	428.372	6.851
Oenocarpus bataua	Oenocarpus bataua Mart.	3	LO2_T0000	11.93	6.67	50.04	21.47	471.376	0.11	166.894	3.54801
Oenocarpus bataua	Oenocarpus bataua Mart.	4	LO3_T1500	12.6	12	47.65	19.99	328.433	0.1	418.628	5.10093
Oenocarpus bataua	Oenocarpus bataua Mart.	5	LO3_T1500	12.6	11	47.28	19.24	335.389	0.09	430.677	4.07333
Oenocarpus bataua	Oenocarpus bataua Mart.	6	LO3_T2500	1.44	12.67	46.99	41.88	463.075	0.11	511.446	4.73676
Oenocarpus bataua	Oenocarpus bataua Mart.	7	LO4_T1500	4.35	19	40.17	28.39	476.606	0.12	309.204	15.7831
Oenocarpus bataua	Oenocarpus bataua Mart.	8	LO4_T1500	4.35	27.33	46.13	19.11	467.323	0.1	378.217	9.61517
Oenocarpus bataua	Oenocarpus bataua Mart.	9	LO4_T1500	4.35	14.33	44.79	10.39	367.745	0.11	308.787	4.45135
Oenocarpus bataua	Oenocarpus bataua Mart.	10	LO4_T1500	4.35	31.33	43.37	12.8	496.526	0.11	375.028	11.3775
Oenocarpus minor	Oenocarpus minor Mart.	1	LO3_T1500	12.6	16.67	51.72	21.79	480.791	0.11	384.978	2.51728
Oenocarpus minor	Oenocarpus minor Mart.	2	LO3_T1500	12.6	16	52.93	13.11	534.404	0.11	239.218	1.61077
Oenocarpus minor	Oenocarpus minor Mart.	3	LO3_T1500	12.6	16.33	52.49	14.96	411.302	0.12	322.272	2.38592
Oenocarpus minor	Oenocarpus minor Mart.	4	LO3_T2500	1.44	17	50.43	12.12	405.117	0.11	384.978	3.80545
Oenocarpus minor	Oenocarpus minor Mart.	5	LO2_T4500	18.35	18	50.2	29.25	486.05	0.12	256.277	1.78126
Oenocarpus minor	Oenocarpus minor Mart.	6	LO2_T4500	18.35	17.67	52.61	29.98	465.702	0.12	381.212	2.23689
Oenocarpus minor	Oenocarpus minor Mart.	7	LO2_T4500	18.35	18	50.53	23.53	493.922	0.1	322.041	2.09964
Oenocarpus minor	Oenocarpus minor Mart.	8	LO2_T4500	18.35	18.67	48.72	21.97	464.612	0.11	396.249	2.11717
Oenocarpus minor	Oenocarpus minor Mart.	9	LO2_T4500	18.35	19.67	47.83	10.54	496.99	0.11	295.777	2.70477
Oenocarpus minor	Oenocarpus minor Mart.	10	LO2_T4500	18.35	16.67	50.15	14.38	452.019	0.1	495.435	2.70975
Socratea exorrhiza	Socratea exorrhiza (Mart.) H.Wendl.	1	LO2_T0000	11.93	7	66.61	11.04	467.897	0.11	206.579	1.11156
Socratea exorrhiza	Socratea exorrhiza (Mart.) H.Wendl.	2	LO2_T0000	11.93	7	68.05	15.34	454.459	0.09	142.211	0.911266
Socratea exorrhiza	Socratea exorrhiza (Mart.) H.Wendl.	3	LO2_T0000	11.93	9.33	68.98	6.63	486.172	0.1	303.312	1.84327
Socratea exorrhiza	Socratea exorrhiza (Mart.) H.Wendl.	4	LO2_T0000	11.93	8	68.99	14.88	442.464	0.12	232.723	1.22536
Socratea exorrhiza	Socratea exorrhiza (Mart.) H.Wendl.	5	LO2_T0000	11.93	6.67	69.67	21.22	466.222	0.11	141.874	0.714364
Socratea exorrhiza	Socratea exorrhiza (Mart.) H.Wendl.	6	LO2_T0000	11.93	8.33	69.16	14.43	437.155	0.1	151.49	0.867541
Socratea exorrhiza	Socratea exorrhiza (Mart.) H.Wendl.	7	LO3_T4500	32.97	7.67	68.44	13.03	423.518	0.1	333.625	1.72382
Socratea exorrhiza	Socratea exorrhiza (Mart.) H.Wendl.	8	LO4_T1500	4.35	6.67	68.29	8.73	430.441	0.12	402.373	1.21238
Socratea exorrhiza	Socratea exorrhiza (Mart.) H.Wendl.	9	LO4_T1500	4.35	7.33	66.66	15.58	490.02	0.14	228.708	3.4518
Socratea exorrhiza	Socratea exorrhiza (Mart.) H.Wendl.	10	LO4_T1500	4.35	7	68.93	14.94	437.057	0.13	401.124	2.62971
Syagrus inajai	Syagrus inajai (Spruce) Becc.	1	LO3_T500	31.96	5.67	71.31	19.55	466.331	0.14	88.6685	0.496187
Syagrus inajai	Syagrus inajai (Spruce) Becc.	2	LO3_T500	31.96	8.67	74.35	17.86	468.488	0.14	88.311	1.40253
Syagrus inajai	Syagrus inajai (Spruce) Becc.	3	LO3_T2500	1.44	11.33	71.47	25.8	487.091	0.17	218.307	4.46607
Syagrus inajai	Syagrus inajai (Spruce) Becc.	4	LO3_T2500	1.44	9.33	66.87	21.91	394.591	0.19	228.89	3.84755
Syagrus inajai	Syagrus inajai (Spruce) Becc.	5	LO3_T2500	1.44	18.33	69.01	29.57	428.343	0.12	213.526	3.80484
Syagrus inajai	Syagrus inajai (Spruce) Becc.	6	LO3_T4500	32.97	8	67.22	9.33	441.391	0.18	107.543	1.5095
Syagrus inajai	Syagrus inajai (Spruce) Becc.	7	LO4_T1500	4.35	11.67	72.66	11.28	393.663	0.2	300.421	3.09853
Syagrus inajai	Syagrus inajai (Spruce) Becc.	8	LO4_T1500	4.35	7.33	65.64	18.01	429.691	0.18	362.851	3.49247
Syagrus inajai	Syagrus inajai (Spruce) Becc.	9	LO4_T1500	4.35	12.67	67.35	23.87	454.074	0.16	165.658	1.66238
Syagrus inajai	Syagrus inajai (Spruce) Becc.	10	LO4_T1500	4.35	12.67	68.16	14.56	391.686	0.19	139.237	1.17801
